# Supplementary material for: Safety and efficacy of autologous cell vaccines in solid tumors: a systematic review and meta-analysis of randomized control trials
Source: PubMed Central journal article supplement (PMC9971202; doi:10.1038/s41598-023-29630-9), 2023-02-27
Supplement: 41598_2023_29630_MOESM4_ESM.pdf [file 41598_2023_29630_MOESM4_ESM.pdf]

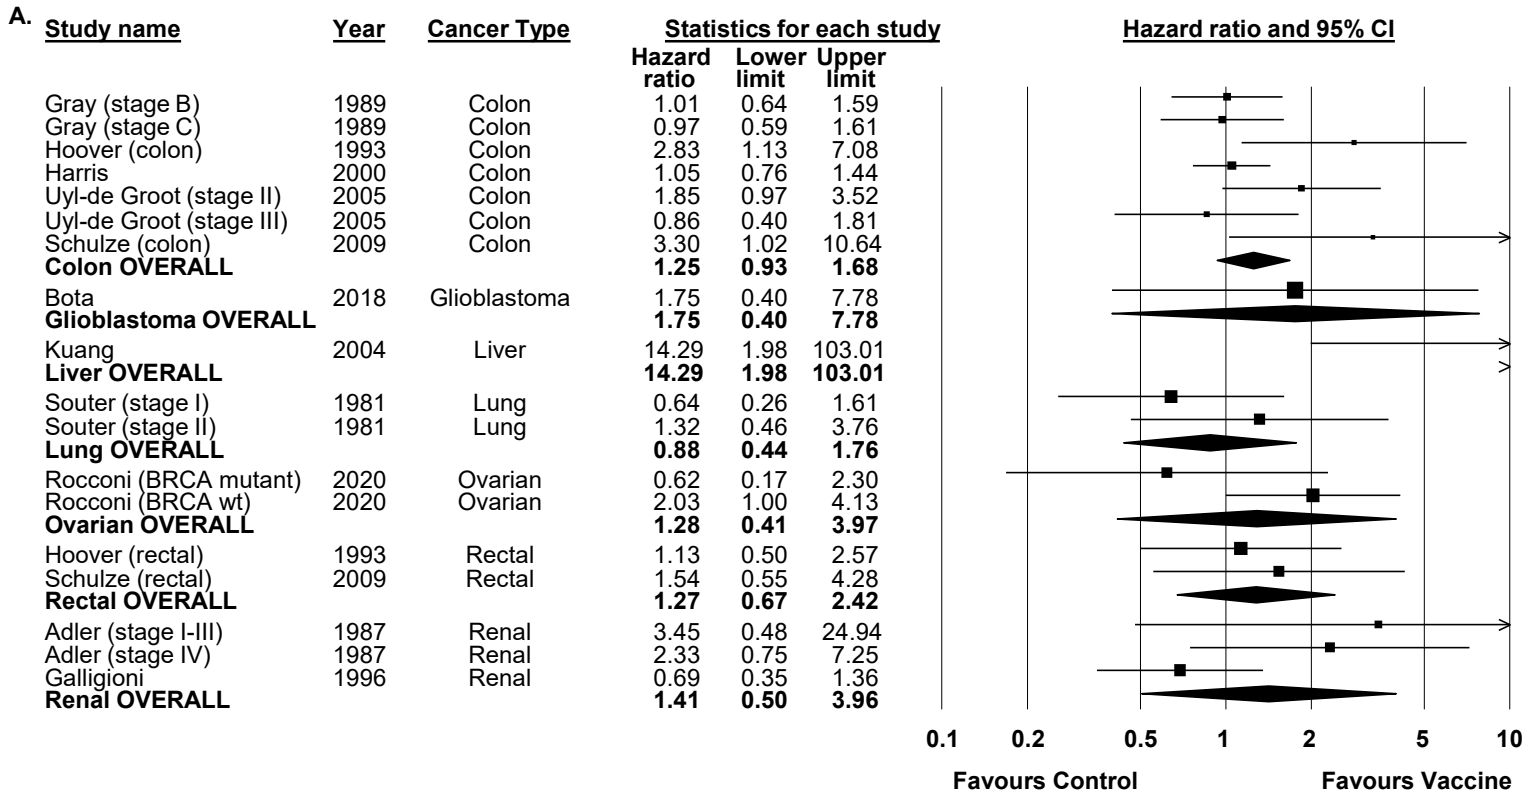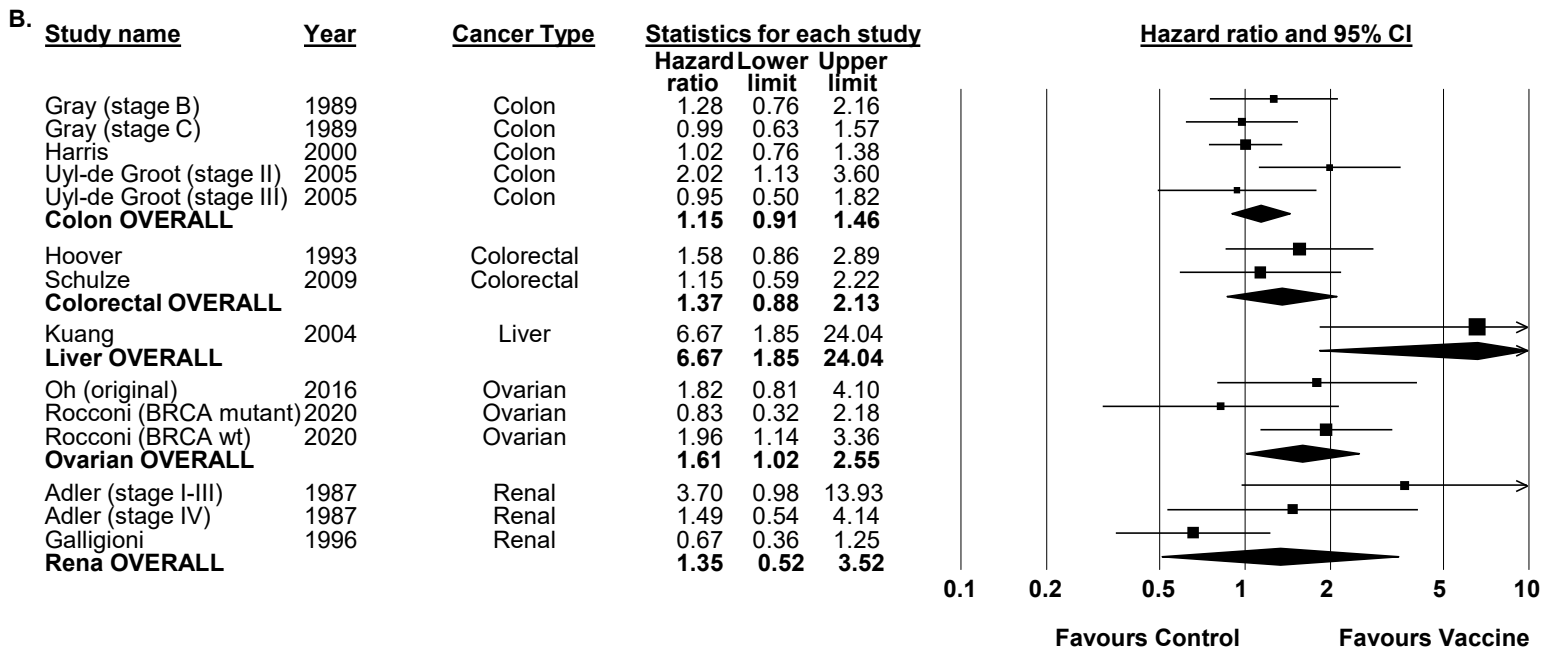

**Supplemental Figure 2. (A and B) Overall Survival (A) and Disease-Free Survival (B) based on disease site.**
