# Supplementary material for: Safety and efficacy of autologous cell vaccines in solid tumors: a systematic review and meta-analysis of randomized control trials
Source: PubMed Central journal article supplement (PMC9971202; doi:10.1038/s41598-023-29630-9), 2023-02-27
Supplement: 41598_2023_29630_MOESM5_ESM.pdf [file 41598_2023_29630_MOESM5_ESM.pdf]

| <u>Study name</u>        | <u>Year</u> | <u>Adjuvant</u> | <u>Statistics for each study</u> |                    |                    |
|--------------------------|-------------|-----------------|----------------------------------|--------------------|--------------------|
|                          |             |                 | <u>Hazard ratio</u>              | <u>Lower limit</u> | <u>Upper limit</u> |
| Adler (stage I-III)      | 1987        | BCG             | 3.45                             | 0.48               | 24.94              |
| Adler (stage IV)         | 1987        | BCG             | 2.33                             | 0.75               | 7.25               |
| Gray (stage B)           | 1989        | BCG             | 1.01                             | 0.64               | 1.59               |
| Gray (stage C)           | 1989        | BCG             | 0.97                             | 0.59               | 1.61               |
| Hoover (colon)           | 1993        | BCG             | 2.83                             | 1.13               | 7.08               |
| Hoover (rectal)          | 1993        | BCG             | 1.13                             | 0.50               | 2.57               |
| Galligioni               | 1996        | BCG             | 0.69                             | 0.35               | 1.36               |
| Harris                   | 2000        | BCG             | 1.05                             | 0.76               | 1.44               |
| Uyl-de Groot (stage II)  | 2005        | BCG             | 1.85                             | 0.97               | 3.52               |
| Uyl-de Groot (stage III) | 2005        | BCG             | 0.86                             | 0.40               | 1.81               |
| <b>BCG OVERALL</b>       |             |                 | <b>1.15</b>                      | <b>0.91</b>        | <b>1.46</b>        |
| Souter (stage I)         | 1981        | C Parvum        | 0.64                             | 0.26               | 1.61               |
| Souter (stage II)        | 1981        | C Parvum        | 1.32                             | 0.46               | 3.76               |
| <b>C Parvum OVERALL</b>  |             |                 | <b>0.88</b>                      | <b>0.44</b>        | <b>1.76</b>        |
| Kuang                    | 2004        | GMCSF           | 14.29                            | 1.98               | 103.01             |
| Bota                     | 2018        | GMCSF           | 1.75                             | 0.40               | 7.78               |
| Rocconi (BRCA mutant)    | 2020        | GMCSF           | 0.62                             | 0.17               | 2.30               |
| Rocconi (BRCA wt)        | 2020        | GMCSF           | 2.03                             | 1.00               | 4.13               |
| <b>GMCSF OVERALL</b>     |             |                 | <b>1.99</b>                      | <b>0.75</b>        | <b>5.25</b>        |
| Schulze (colon)          | 2009        | NDV             | 3.30                             | 1.02               | 10.64              |
| Schulze (rectal)         | 2009        | NDV             | 1.54                             | 0.55               | 4.28               |
| <b>NDV OVERALL</b>       |             |                 | <b>2.14</b>                      | <b>0.99</b>        | <b>4.62</b>        |

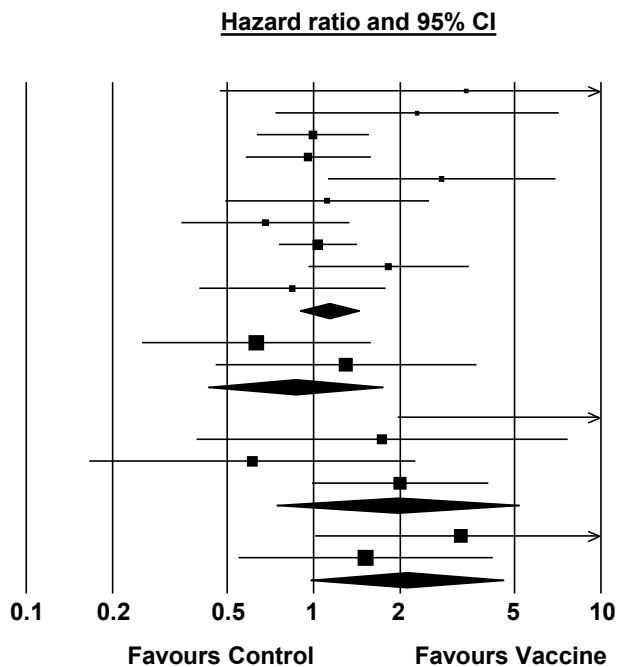

**Supplemental Figure 3. Overall Survival based on adjuvant.**
